# Supplementary material for: Energetic carbon precursors for micro-supercapacitor printing
Source: Royal Society of Chemistry journal article supplement (doi:10.1039/d1ma00556a), 2021-01-01
Supplement: d1ma00556a1.pdf [file d1ma00556a1.pdf]

## Supporting Information

### Energetic carbon precursors for micro-supercapacitor printing

Christin Gellrich, Stefanie Lochmann, Thomas Otto, Julia Grothe and Stefan Kaskel\*

#### Characterization of the carbon powder

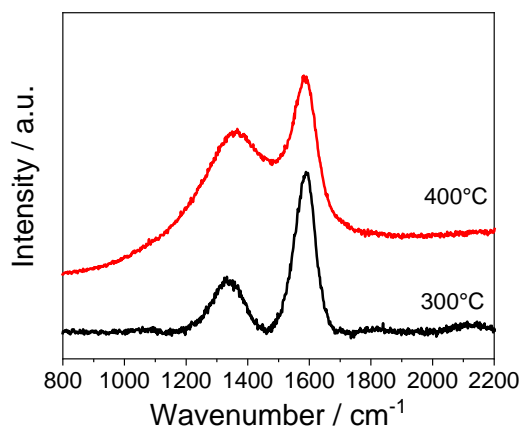

S1: Raman spectra of the carbon powder carbonized at 300 °C and 400 °C in air.

#### Characterization of the printed structure

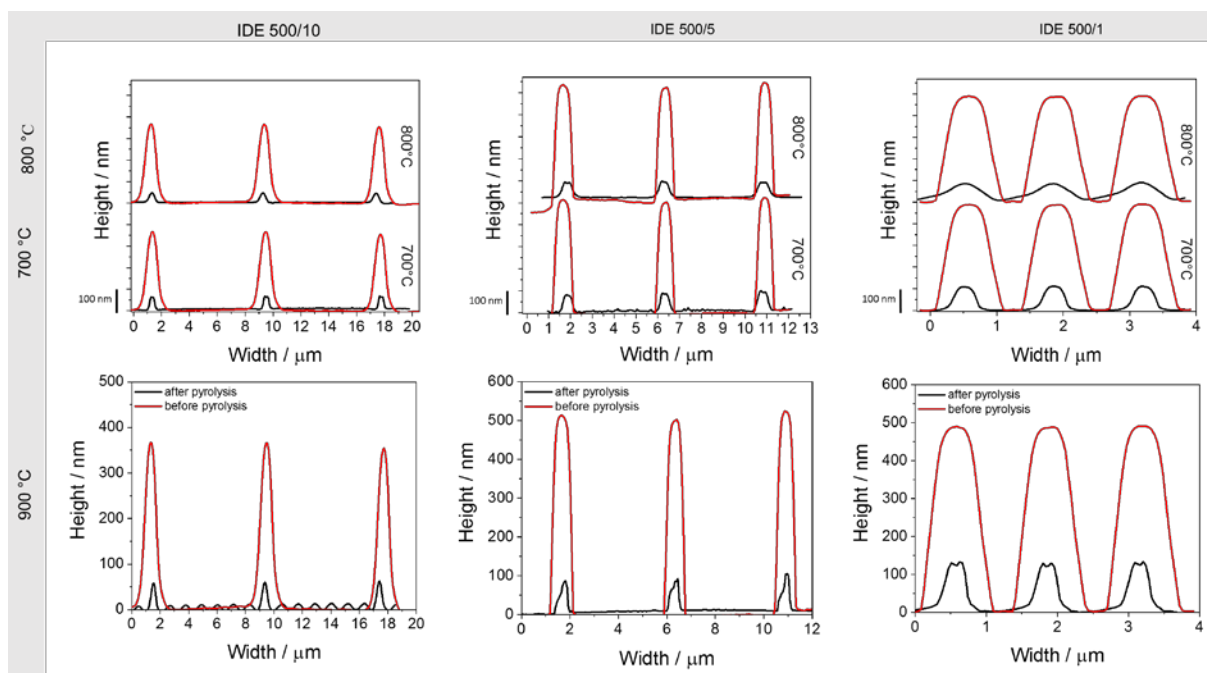

S2: Height profiles (after printing red lines, after pyrolysis black lines) for the three structures obtained at different pyrolysis temperatures.

### Electrochemical characterization of the film EDLCs

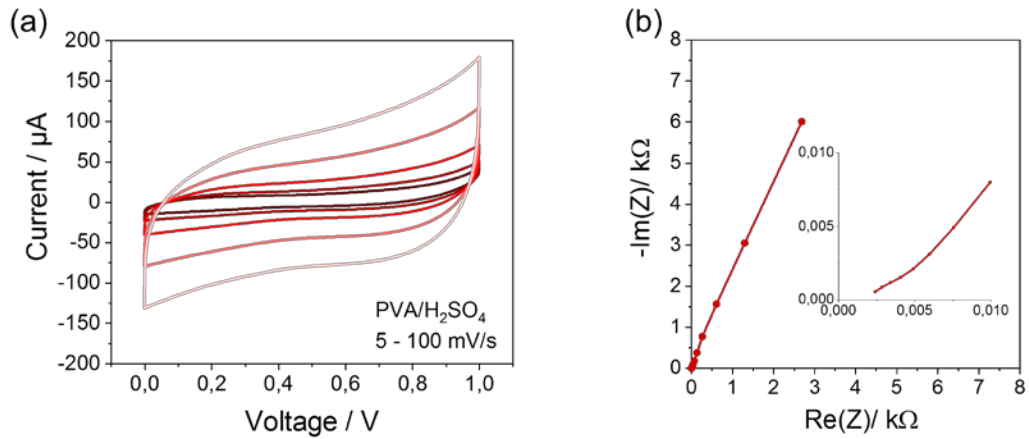

S3: Electrochemical characterization of the thin film EDLC pyrolyzed at 800 °C (CV-curves (a) and Nyquist plot (b)).

### Electrochemical characterization of IDE 500/5 and IDE 500/1

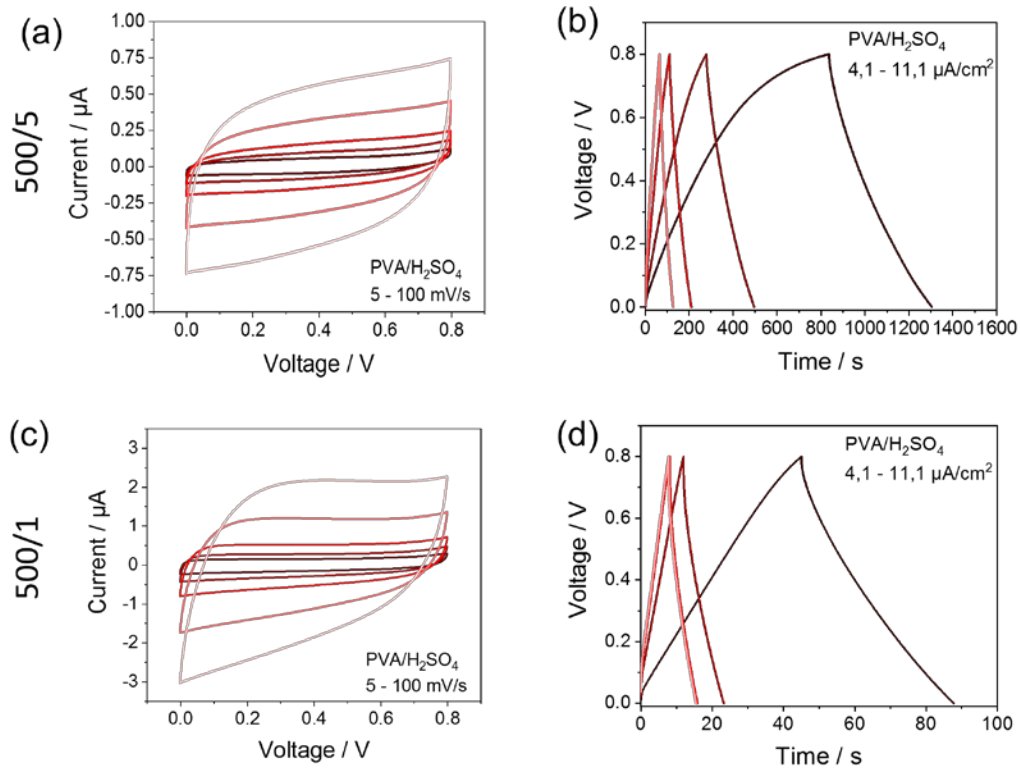

S4: Electrochemical characterization of IDE 500/5 (CV-curves (a) and GCD curve (b) and IDE 500/1 (CV-curves (c) and GCD-curve (d)) both pyrolyzed at 900 °C.

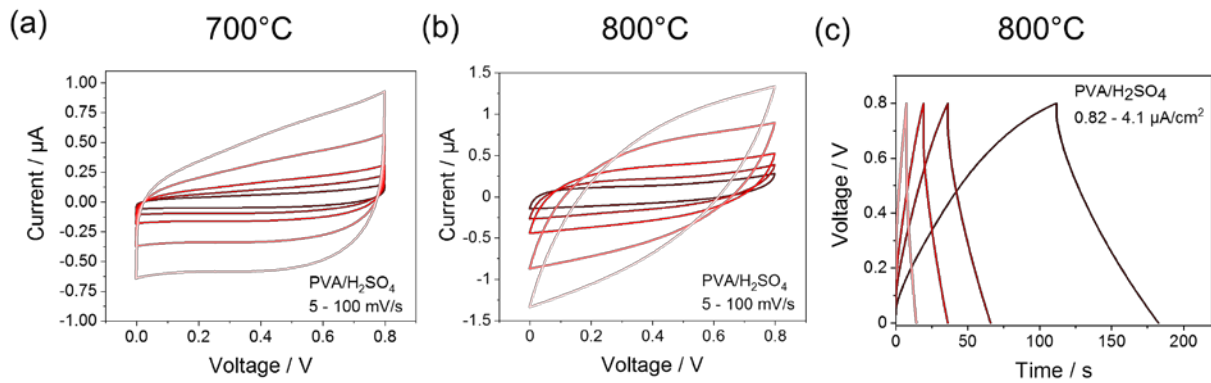

S5: Electrochemical characterization of IDE 500/1 (CV-curves (a) and (b), GDC-curves (c) at different carbonization temperatures).
